# Supplementary material for: Surveillance of The Major Pathogenic Arboviruses of Public Health Concern in Gabon, Central Africa: Increased Risk of West Nile Virus and Dengue Virus Infection
Source: Research Square preprint supplement (doi:10.21203/rs.3.rs-113570/v1), 2020-12-03
Supplement: Supplementary file 4 [file 257ebcc70965f35f63292859.xlsx]

## Sheet: Table S1
Table S1 OD value examined to determine cross-reactivity within the genus Flavivirus
	WNV NS1	DENV NS1	ZIKV NS1	YFV NS1
anti-WNV plasma	-	0.04	0	0
anti-DENV serum	0.02	-	0.07	0
anti-ZIKV serum	0.29 (>0.21a)	3.96 (>0.38b)	-	0.03
anti-YFV serum	0	0.56 (>0.38b)	0.05	-
WNV West Nile virus, DENV dengue virus, ZIKV Zika virus, YFV yellow fever virus, NS1 non-structural protein 1
Bold indicates a cross-reactivity
a A cut-off value of WNV-NS1 based ELISA
b A cut-off value of DENV-NS1 based ELISA
