# Supplementary material for: Surveillance of The Major Pathogenic Arboviruses of Public Health Concern in Gabon, Central Africa: Increased Risk of West Nile Virus and Dengue Virus Infection
Source: Research Square preprint supplement (doi:10.21203/rs.3.rs-113570/v1), 2020-12-03
Supplement: Supplementary file 5 [file c8dfabbf2c33ab353a2428e7.xlsx]

## Sheet: Table S3
Table S3 Coverage of yellow fever-vaccine and recent report in African countries at risk for yellow fever epidemic
Country	Coverage (%) in 2014	Coverage (%) in 2018	Recent report year (case)
Angola	48	28	2016 (881)
Benin	63	71	2000 (10)
Burkina Faso	88	85	2017 (5)
Burundi	NA	NA	1995 (260)
Cameroon	80	74	2016 (61), 2018 (5)
Cape Verde	NA	NA	NA
Central African Republic	48	48	2018 (1)
Chad	34	29	2018 (416)
Côte d'Ivoire	52	73	2017 (11)
Democratic Republic of the Congo	65	81	2016 (77), 2018 (15)
Equatorial Guinea	NA	30	2008 (10)
Ethiopia	NA	NA	2013 (223), 2018 (5)
Gabon	60	59	2006 (57), 2015 (1)
Gambia	96	91	2003 (9), 2012 (1)
Ghana	92	91	2010 (155), 2016 (1)
Guinea	45	43	2005 (215), 2017 (1)
Guinea-Bissau	53	85	2018 (11)
Kenya	1	1	2016 (3)
Liberia	54	84	2012 (17)
Mali	59	67	2018 (225)
Mauritania	NA	NA	2003 (10)
Niger	79	78	2011 (20)
Nigeria	49	65	2011 (387), 2018 (47)
Rwanda	NA	NA	NA
Republic of Congo	80	66	2011 (188)
Sao Tomé and Principe	NA	NA	NA
Senegal	80	75	2003 (163), 2015 (1)
Sierra Leone	80	80	2012 (94)
Somalia	NA	NA	NA
Sudan	NA	NA	NA
Tanzania	NA	NA	NA
Togo	82	86	2018 (14)
Uganda	NA	NA	2010 (106), 2018 (2)
Average	63.0909	64.7826
NA not applicable
Source: [24]
Reference
24. World Health Organization: Country profiles, data and statistics on immunization. Available at: https://www.who.int/immunization/monitoring_surveillance/en/. Accessed 4 Jan 2020.
