# Supplementary material for: Surveillance of The Major Pathogenic Arboviruses of Public Health Concern in Gabon, Central Africa: Increased Risk of West Nile Virus and Dengue Virus Infection
Source: Research Square preprint supplement (doi:10.21203/rs.3.rs-113570/v1), 2020-12-03
Supplement: Supplementary file 6 [file dacd6e61b33cc1a365dbe27c.xlsx]

## Sheet: Table S2
Table S2 Studies on the arbovirus infections which are public health concerns in Gabon
	Year	Detection	Location	Sample size	Sample	Observation	Reference
West Nile virus
	2002-2005	Antibody	Libreville, Port-Gentil, Moanda	64	Hourse	3% The other five countries: High (28%–97%)	1
	2005-2008	Antibody	Rural area (includes Moyen-Ogooue)	2320	Living people from 115 villages	27.2% (overall); 23.7% (forested regions), 21.8% (savanna), 64.9% (lakes region)	2
Dengue virus (serotypes were not known)
	2002-2005	Antibody	Lambaréné	162	Enfant (3, 9, 15, 30 months)	1.2% (3months), 1.9% (9months), 3.7% (15months), 12.3% (30months)	3
	2005-2008	Antibody	Rural area (includes Moyen-Ogooue)	4341 236 (2005-2010)	People living in rural area Monkey	Human: 0.5% (20/4341) Monkey: 0%	4
	2006-2007	Gene/Antibody	Infirmary of the French camp	35	Patients during a 2006-2007 dengue-like syndrome outbreak	Gene: 2.86% (1/35) Antibody: 20%(7/35)	5
	2007	Gene	Libreville, Oyem, Cocobeach. Lastourville	NA	A. albopictus, A. aegypti	Positive: A. albopictus No detection: A. aegypti	6
	2007, 2010	Gene	Cocobeach, Libreville	4665	A. albopictus	A. albopictus: positive (LBV) *No detection in 2010.	7
Dengue virus serotype 1
	2007-2010	Gene	Libreville, Lambaréné, Franceville	4287	Patient with symptom	7.1% (306/4287)	8
	2007-2010	Gene	Whole Gabon	4287	Patient with symptom	4.9% (20/4287), detected in Libreville, Lambaréné, Franceville in 2007 and 2010	9
Dengue virus serotype 2
	1990s	Susceptibity	Franceville	NA	A. aegypti aegypti, A. aegypti formosus	Susceptibity: A. aegypti formosus was lower than A. Aegypti	10
	2007	Gene	Military Camp in Libreville	NA	A. albopictus, A. aegypti	13-21.4% (A. albopictus), 92% (A. aegypti)	11
	2007	Gene	Libreville, Ntoum, Kango, Mitzic, Oyem, Minvoul, Cocobeach	773	Febrile patient	6.99% (54/773), positive: LBV, Oyem, Minvoul, Cocobeach Co-infectino with CHIKV: 1.04% (8/773)	12
	2007-2010	Gene	Libreville, Lambaréné, Franceville, Cocobeach, Ndjole, Koulamoutou, Lastourville, Okondja, Minvoul, Oyem	4287	Febrile patient	8.3% (376/4287) Co-infection with CHIKV: 0.9% (37/4287)	8
	2007-2010	Gene	Whole Gabon	4287	Febrile patient	9.00% (386/4287), detected in whole Gabon	9
Dengue virus serotype 3
	2010	Gene	Franceville	4287	Febrile patient	0.02% (1/4287), Franceville in 2010	9
	2015-2017	Gene	Lambaréné	1107	Febrile patient	1.69% (17/1107); 8.06% in adult; 0.25% in children	13
Zika virus
	1975	Antibody	South-eastern part	1279	Healthy people	Positive	14
	1982	Antibody	South-eastern part	197 34 28	Human (adult) Simian Paired sera of mothers and their new-borns	Simian: positive Maternal antibody: positive	15
	2007, 2010	Gene	Cocobeach, Libreville	4312 4665	Human A. albopictus	Human: positive (Cocobeach) A. albopictus: positive (Libreville), found co-infection with CHIKV was detected. *No detection (human and mosquito) in 2010.	7
Yellow fever virus
	1975	Antibody	South-Eastern part	1279	Healthy people	More than 80% (as consequence of mass vaccination campaign)	14
	1982	Antibody	South-Eastern part	197 34 28	Human (adult) Simian Paired sera of mothers and their new-borns	Human: 88% Maternal antibody: positive	15
	1994	Gene	North part	37	Patient with symptom	0.27	16
	1994-1995	NA	NA	NA	NA	44 cases	17
	2001	NA	NA	NA	NA	2 cases	17
	2006	NA	NA	NA	NA	57 cases	17
	2015	NA	NA	NA	NA	1 case	17
Chikungunya virus
	1975	Antibody	South-Eastern part	1279	Healthy people	Positive	14
	1982	Antibody	South-Eastern part	197 34 28	Human (adult) Simian Paired sera of mothers and their new-borns	Human: 20% Siman: positive Maternal antibody: positive	15
	2002-2005	Antibody	Lambaréné	162	Enfant (3, 9, 15, 30 months)	0.6% (1/162) in 15months, only detected	3
	2006-2007	Gene/Antibody	Infirmary of the French camp	35	Patients during a 2006-2007 dengue-like syndrome outbreak	Gene: 20% (7/35) Antibody: 5.71%(2/35)	5
	2007-2010	Gene	Libreville, Lambaréné, Franceville, Cocobeach, Ndjole, Koulamoutou, Lastourville, Okondja, Minvoul, Oyem	4287	Febrile patient	36.6% (1567/4287) Co-infection with DENV: 0.9% (37/4287)	8
	2007-2013	Gene	Provinces except Ogooue-Ivindo, Nyanga	436	Patient undiagnosed	8.5% (37/436) Sample in 2007 (CHIKV-negative) -> All negative against DENV, YFV, RVFV, WNV, ZIKV	18
	2007	Gene	Military Camp in Libreville	NA	A. albopictus, A. aegypti	66.7-86% (A. albopictus), 55-100% (A. aegypti)	11
	2007	Gene	Inside and outside of Military Camp in Libreville	10605	Mosquito including A. albopictus and A. aegypti	Positive: 2.5% in A. albopictus	19
	2007	Gene	Libreville, suburbs, Oyem, Cocobeach, Lastourville	N/A	A. albopictus, A. aegypti	Positive: A. albopictus No detection: A. aegypti	6
	2007	Gene	Libreville, Ntoum, Kango, Mitzic, Oyem, Minvoul, Cocobeach	773	Febrile patient	35.6% (275/773), negative:Cocobeach Co-infectino with DENV: 1.04% (8/773)	12
	2010	Gene	Ndangui (outbreak)	640	A. albopictus, A. aegypti, A. simpsoni	71% (A. albopictus), 17% (A. aegypti)	20
Rift Valley fever virus
	1985-1987	Antibody	Libreville, Port-Gentil, Makokou, Franceville	1469	Healthy people	0.14% (2/1469) in Port Gentil	21
	2005-2008	Antibody	Rural area (includes Moyen-Ogooue)	4323	Healthy people	3.3% (overall); 2.9% (forest), 2.2% (savannas), 8.3% (lakes)	22
	2014	Antibody	Nyanga province (closed to Tchibanga)	95 106	Sheep Goats	6.47% in sheep and goats (overall); 10.25% (sheep), 6.41% (goats)	23
NA not applicable
Reference
1. Cabre O, Grandadam M, Marié JL, Gravier P, Prangé A, Santinelli Y, Rous V, Bourry O, Durand JP, Tolou H, et al. West Nile Virus in horses, sub-Saharan Africa. Emerg Infect Dis. 2006;12(12):1958-60.
2. Pourrut X, Nkoghe D, Paweska J, Leroy E. First serological evidence of West Nile virus in human rural populations of Gabon. Virol J. 2010;7:132-4.
3. Gabor JJ, Schwarz NG, Esen M, Kremsner PG, Grobusch MP. Dengue and chikungunya seroprevalence in Gabonese infants prior to major outbreaks in 2007 and 2010: A sero-epidemiological study. Travel Med Infect Dis. 2016;14(1):26-31.
4. Pourrut X, Nkoghé D, Gonzalez JP, Leroy E. No evidence of dengue virus circulation in rural Gabon. Emerg Infect Dis. 2011;17(8):1568-9.
5. Peyrefitte CN, Bessaud M, Pastorino BA, Gravier P, Plumet S, Merle OL, Moltini I, Coppin E, Tock F, Daries W, et al. Circulation of Chikungunya virus in Gabon, 2006-2007. J Med Virol. 2008;80(3):430-3.
6. Paupy C, Ollomo B, Kamgang B, Moutailler S, Rousset D, Demanou M, Hervé JP, Leroy E, Simard F. Comparative role of Aedes albopictus and Aedes aegypti in the emergence of Dengue and Chikungunya in central Africa. Vector Borne Zoonotic Dis. 2010;10(3):259-66.
7. Grard G, Caron M, Mombo IM, Nkoghe D, Mboui Ondo S, Jiolle D, Fontenille D, Paupy C, Leroy EM. Zika virus in Gabon (Central Africa)--2007: a new threat from Aedes albopictus? PLoS Negl Trop Dis. 2014;8(2):e2681.
8. Caron M, Paupy C, Grard G, Becquart P, Mombo I, Nso BB, Kassa Kassa F, Nkoghe D, Leroy EM. Recent introduction and rapid dissemination of Chikungunya virus and Dengue virus serotype 2 associated with human and mosquito coinfections in Gabon, central Africa. Clin Infect Dis. 2012;55(6):e45-53.
9. Caron M, Grard G, Paupy C, Mombo IM, Bikie Bi Nso B, Kassa Kassa FR, Nkoghe D, Leroy EM. First evidence of simultaneous circulation of three different dengue virus serotypes in Africa. PloS One. 2013; 8(10):e78030.
10. Vazeille-Falcoz M, Failloux AB, Mousson L, Elissa N, Rodhain F. Oral receptivity of Aedes aegypti formosus from Franceville (Gabon, central Africa) for type 2 dengue virus. [Article in French]. Bull Soc Pathol Exot. 1999;92(5):341-2.
11. Vazeille M, Moutailler S, Pages F, Jarjaval F, Failloux AB. Introduction of Aedes albopictus in Gabon: what consequences for dengue and chikungunya transmission? Trop Med Int Health. 2008;13(9):1176-9.
12. Leroy EM, Nkoghe D, Ollomo B, Nze-Nkogue C, Becquart P, Grard G, Pourrut X, Charrel R, Moureau G, Ndjoyi-Mbiguino A, et al. Concurrent chikungunya and dengue virus infections during simultaneous outbreaks, Gabon, 2007. Emerg Infect Dis. 2009;15(4):591-3.
13. Abe H, Ushijima Y, Loembe MM, Bikangui R, Nguema-Ondo G, Mpingabo PI, Zadeh VR, Pemba CM, Kurosaki Y, Igasaki Y,et al. Re-emergence of dengue virus serotype 3 infections in Gabon in 2016-2017, and evidence for the risk of repeated dengue virus infections. Int J Infect Dis. 2019; 91:129-36.
14. Jan C, Languillat G, Renaudet J, Robin Y. A serological survey of arboviruses in Gabon. [Article in French]. Bull Soc Pathol Exot Filiales. 1978;71(2):140-6.
15. Saluzzo JF, Ivanoff B, Languillat G, Georges AJ. Serological survey for arbovirus antibodies in the human and simian populations of the South-East of Gabon. [Article in French]. Bull Soc Pathol Exot Filiales. 1982;75(3):262-6.
16. Pisano MR, Durand JP, Tolou H. Partial genomic sequence determination of yellow fever virus strain associated with a recent epidemic in Gabon. Acta Virol. 1996;40(2):103-5.
17. World Health Organization: WHO vaccine-preventable diseases: monitoring system. 2019 global summary. http://apps.who.int/immunization_monitoring/globalsummary/countries?countrycriteria%5Bcountry%5D%5B%5D=GAB&commit=OK#. Accessed 2 Jan 2020.
18. Simo Tchetgna H, Sem Ouilibona R, Nkili-Meyong AA, Caron M, Labouba I, Selekon B, Njouom R, Leroy EM, Nakoune E, Berthet N. Viral Exploration of Negative Acute Febrile Cases Observed during Chikungunya Outbreaks in Gabon. Intervirology. 2018;61(4):174-84.
19. Pagès F, Peyrefitte CN, Mve MT, Jarjaval F, Brisse S, Iteman I, Gravier P, Tolou H, Nkoghe D, Grandadam M. Aedes albopictus mosquito: the main vector of the 2007 Chikungunya outbreak in Gabon. PLoS One. 2009;4(3):e4691.
20. Paupy C, Kassa Kassa F, Caron M, Nkoghe D, Leroy EM. A chikungunya outbreak associated with the vector Aedes albopictus in remote villages of Gabon. Vector Borne Zoonotic Dis. 2012;12(2):167-9.
21. Gonzalez JP, Josse R, Johnson ED, Merlin M, Georges AJ, Abandja J, Danyod M, Delaporte E, Dupont A, Ghogomu A, et al. Antibody prevalence against haemorrhagic fever viruses in randomized representative Central African populations. Res Virol. 1989;140(4):319-31.
22. Pourrut X, Nkoghé D, Souris M, Paupy C, Paweska J, Padilla C, Moussavou G, Leroy EM. Rift Valley fever virus seroprevalence in human rural populations of Gabon. PLoS Negl Trop Dis. 2010;4(7):e763.
23. Maganga GD, Abessolo Ndong AL, Mikala Okouyi CS, Makiala Mandanda S, N'Dilimabaka N, Pinto A, Agossou E, Cossic B, Akue JP, Leroy EM. Serological Evidence for the Circulation of Rift Valley Fever Virus in Domestic Small Ruminants in Southern Gabon. Vector Borne Zoonotic Dis. 2017;17(6):443-6.
